## **IWS1 phosphorylation by AKT3 controls nuclear export of type I IFN mRNAs and sensitivity to oncolytic viral infection, by regulating the alternative RNA splicing of U2AF2.**

Georgios I. Laliotis , Adam D. Kenney , Evangelia Chavdoula , Arturo Orlacchio , Abdul Kaba, Alessandro La Ferlita, Vollter Anastas, Christos Tsatsanis, Joal D. Beane , Lalit Sehgal, Vincenzo Coppola, Jacob S. Yount and Philip N. Tsihchlis \*

The authors have withdrawn their manuscript. While attempting to reproduce the data on the alternative splicing of exon 2 of U2AF2, they observed that the proposed splicing mechanism could not give rise to a functional U2AF2 protein. In addition, they observed evidence of manipulation in the electropherogram of the splicing junction between exons 1 and 3 and in the primary data on which this electropherogram was based, which were deposited in Mendeley by the first author. These observations raise questions on the integrity of the reported results. In light of this information, the authors have no confidence in the key findings of the paper, and therefore, do not wish it to be cited. If you have any questions, please contact the corresponding author.
